# Supplementary material
Source: Springer Nature journal article supplement (https://www.springermedizin.de/resource/supplementary/12916_2010_369_MOESM5_ESM.pdf/9599806)

**Cross-corr Glucose ICP**

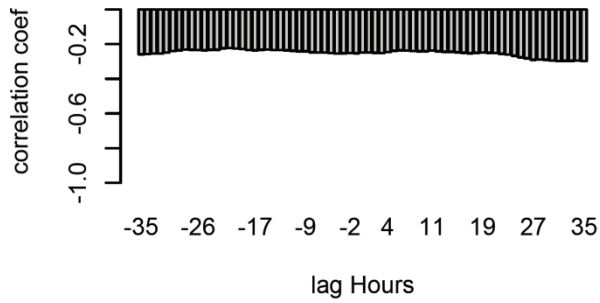

**Cross-corr Lactate ICP**

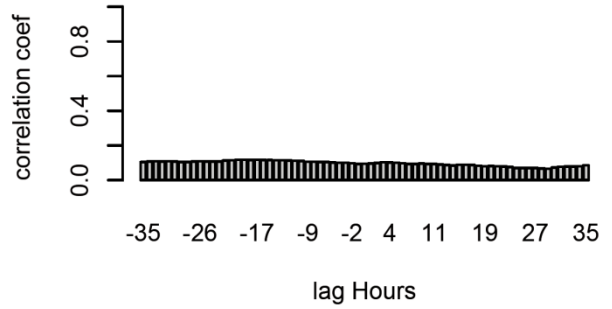

**Cross-corr Pyruvate ICP**

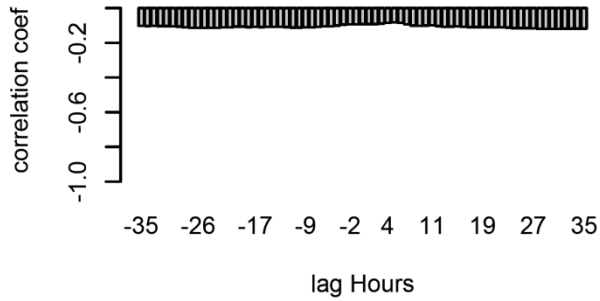

**Cross-corr Glycerol ICP**

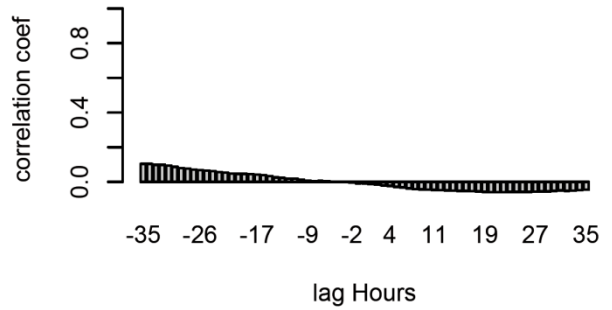

**Cross-corr LP-ratio ICP**

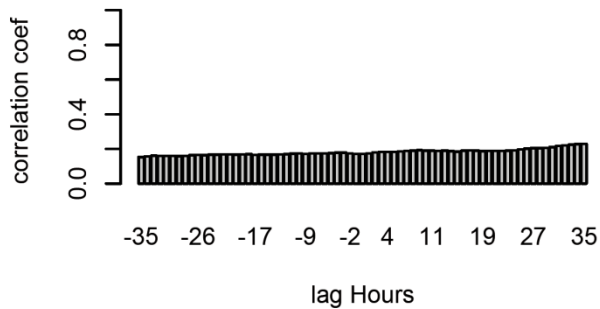

**Cross-corr LG-ratio ICP**

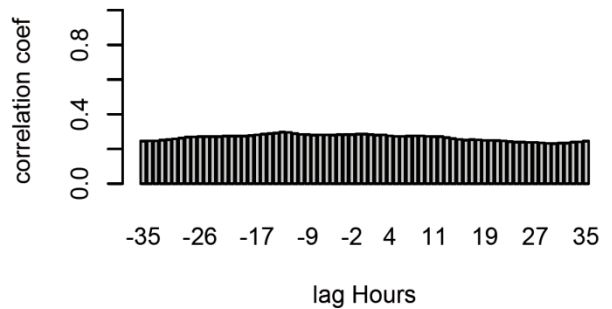

Supplement: MOESM5 [file 9599806]
